# Supplementary material for: Protecting white Carrara marble with organophosphorus salts: a case study of ammonium hydrogen phenylphosphonate
Source: Royal Society of Chemistry journal article supplement (doi:10.1039/d5ma01116g), 2025-12-29
Supplement: d5ma01116g1.pdf [file d5ma01116g1.pdf]

## Electronic Supplementary Information

### Protecting white Carrara marble with organophosphorus salts: case study of ammonium hydrogen phenylphosphonate

Simone Murgia,<sup>a</sup> M. Carla Aragoni,<sup>a</sup> Gianfranco Carcangiu,<sup>b</sup> Simon J. Coles,<sup>c</sup> Stefano Columbu,<sup>a</sup> Guido Ennas,<sup>a</sup> Vito Lippolis,<sup>a</sup> Paola Meloni,<sup>\*d,e</sup> Antonia Navarro Ezquerra,<sup>f</sup> James B. Orton,<sup>c</sup> Anna Pintus,<sup>a</sup> Enrico Podda,<sup>a,g</sup> Daniel N. Rainer,<sup>c</sup> Domingo Gimeno Torrente,<sup>\*h</sup> and Massimiliano Arca<sup>\*a</sup>

- <sup>a</sup> Università degli Studi di Cagliari, Dipartimento di Scienze Chimiche e Geologiche, S. S. 554 Bivio per Sestu, 09042 Monserrato (Cagliari), Italy.
- <sup>b</sup> Consiglio Nazionale Delle Ricerche (CNR), Istituto di Scienze dell'Atmosfera e Del Clima (ISAC), UOS di Cagliari c/o Dipartimento di Fisica, Università degli Studi di Cagliari, S.S. 554 bivio per Sestu, 09042 Monserrato (Cagliari), Italy.
- <sup>c</sup> UK National Crystallography Service, School of Chemistry, Faculty of Engineering and Physical Sciences, University of Southampton, SO17 1BJ, United Kingdom.
- <sup>d</sup> Dipartimento di Ingegneria Meccanica, Chimica e dei Materiali, Via Marengo 2, 09123 Cagliari, Italy.
- <sup>e</sup> Laboratorio Colle di Bonaria, Università degli Studi di Cagliari, Via Ravenna snc, 09125 Cagliari, Italy.
- <sup>f</sup> Departamento de Tecnología de la Arquitectura, EPSEB-UPC, Avda. Doctor Marañón, 44-50, 08028 Barcelona, Spain.
- <sup>g</sup> Centro Servizi di Ateneo per la Ricerca (CeSAR), Università degli Studi di Cagliari, S. S. 554 Bivio Sestu, 09042 Monserrato (Cagliari), Italy.
- <sup>h</sup> Facultat de Ciències de la Terra, Universitat de Barcelona, c/ Martí i Franquès s/n, 08028 Barcelona, Spain.

E-mail: marca@unica.it (Prof. M. Arca); d.gimeno.torrente@gmail.com (Prof. D. Gimeno Torrente);  
paola.meloni@unica.it (Prof. P. Meloni).

**Table S1.** Methodology adopted for the synthesis and characterization of compounds **1** and **2**, the preparation and treatments on Carrara marble samples, and the characterization of treated mock-ups.

| 1. Synthesis and Characterization                                                                                                                                                                       | 2. Reactivity Towards CaCO <sub>3</sub> Powder                               | 3. Assays with white Carrara marble Fragments            |                                                                                     |                                                              |
|---------------------------------------------------------------------------------------------------------------------------------------------------------------------------------------------------------|------------------------------------------------------------------------------|----------------------------------------------------------|-------------------------------------------------------------------------------------|--------------------------------------------------------------|
| Synthesis of compound 1<br><br>2 PhPO <sub>3</sub> H <sub>2</sub> + (NH <sub>4</sub> ) <sub>2</sub> CO <sub>3</sub> →<br>2 (NH <sub>4</sub> )(PhPO <sub>3</sub> H) + CO <sub>2</sub> + H <sub>2</sub> O | Synthesis of compound 2<br><br>(Compound 1 + CaCO <sub>3</sub> powder)       | Thermal Weathering                                       | Application of Ammonium Hydrogen Phenylphosphonate 5%w/w (0.3 mol L <sup>-1</sup> ) | → Immersion treat.<br>→ Spraying treat.<br>→ Brushing treat. |
| Fourier Transform Infrared Spectroscopy (FT-IR)                                                                                                                                                         | Fourier Transform Infrared Spectroscopy (FT-IR)                              | Grazing Incidence X-ray Diffraction (GID-XRD)            | Colorimetry                                                                         | Capillary Test Uptake                                        |
| Nuclear Magnetic Resonance (NMR) in a solution and solid state                                                                                                                                          | Nuclear Magnetic Resonance (NMR) in solid state                              | Water Saturation Measurements (including under pressure) | Ultrasonic Propagation                                                              | Determination of Drying Properties                           |
| UV-Vis Spectroscopy and Solubility Determination                                                                                                                                                        | Thermogravimetric Analysis (TGA) and Differential Scanning Calorimetry (DSC) | Scanning Electron Microscopy (SEM)                       | Helium Picnometry                                                                   | Mercury Intrusion Porosimetry                                |
| 3D Electron Diffraction (3D ED)                                                                                                                                                                         | Powder X-ray Diffraction (PXRD)                                              | Optical Microscopy (OM)                                  | Vapour Water Permeability                                                           | Shore Scale Hardness (C and D)                               |
| Elemental Analysis                                                                                                                                                                                      | Melting Point                                                                | Surface Roughness Determination                          | Liquid Water Permeability                                                           | Pull-off Test                                                |

**Table S2.** Selected crystal data and structure refinement for compound **2**.

|                                             |                                                                  |
|---------------------------------------------|------------------------------------------------------------------|
| CCDC deposition number                      | 2473954                                                          |
| Empirical formula                           | C <sub>6</sub> H <sub>9</sub> CaO <sub>5</sub> P                 |
| Formula weight                              | 232.18                                                           |
| Temperature/K                               | 175(5)                                                           |
| Crystal system                              | orthorhombic                                                     |
| Space group                                 | <i>Pbca</i>                                                      |
| <i>a</i> /Å                                 | 29.5555(17)                                                      |
| <i>b</i> /Å                                 | 10.9536(4)                                                       |
| <i>c</i> /Å                                 | 5.6509(3)                                                        |
| $\alpha$ /°                                 | 90                                                               |
| $\beta$ /°                                  | 90                                                               |
| $\gamma$ /°                                 | 90                                                               |
| Volume/Å <sup>3</sup>                       | 1829.42(16)                                                      |
| Z                                           | 8                                                                |
| $\rho_{\text{calc}}/\text{cm}^3$            | 1.686                                                            |
| Radiation                                   | electron ( $\lambda = 0.0251$ )                                  |
| 2 $\theta$ range for data collection/°      | 0.164 to 1.8                                                     |
| Reflections collected                       | 6985                                                             |
| Independent reflections                     | 1686 [ $R_{\text{int}} = 0.1236$ , $R_{\text{sigma}} = 0.1129$ ] |
| Data/restraints/parameters                  | 1686/143/122                                                     |
| Goodness-of-fit on $F^2$                    | 1.288                                                            |
| Final R indexes [ $I \geq 2\sigma(I)$ ]     | $R_1 = 0.1861$ , $wR_2 = 0.4445$                                 |
| Final R indexes [all data]                  | $R_1 = 0.2042$ , $wR_2 = 0.4528$                                 |
| Largest diff. peak/hole / e·Å <sup>-3</sup> | 0.42/−0.30                                                       |

**Table S3:** Young elastic module determined for white Carrara marble stone mock-ups exposed to T–S and F–T cycles as pristine, thermally weathered, and immersion-, brushing-, and spraying-treated with a 5.0% w/w solution of compound **1**, along with relative variations ( $\Delta\%$  loss) compared to the values before the treatments.

| Treatment |                     | Young elastic module ( $\text{MN}\cdot\text{m}^{-2}$ ) | $\Delta\%$ <sub>loss</sub> |
|-----------|---------------------|--------------------------------------------------------|----------------------------|
| T–S       | Pristine            | $11.8 \pm 0.4$                                         | <b>–16</b>                 |
|           | Thermally weathered | $1.0 \pm 0.1$                                          | <b>–58</b>                 |
|           | Immersion TR        | $7.3 \pm 0.2$                                          | –5                         |
|           | Brushing TR         | $14.8 \pm 0.5$                                         | –6                         |
|           | Spraying TR         | $10.4 \pm 0.3$                                         | –10                        |
| F–T       | Pristine            | $10.9 \pm 0.3$                                         | <b>–27</b>                 |
|           | Thermally weathered | $2.5 \pm 0.1$                                          | –4                         |
|           | Immersion TR        | $7.7 \pm 0.2$                                          | –8                         |
|           | Brushing TR         | $14.9 \pm 0.5$                                         | <b>–17</b>                 |
|           | Spraying TR         | $8.4 \pm 0.2$                                          | –8                         |



**Table S4:** Physical characterisation of white Carrara marble stone mock-ups as pristine, thermally weathered, and immersion-, brushing-, and spraying-treated with a 5.0% w/w solution of compound **1** before and after the acidic attack.

| Treatment          |                     | Rz<br>( $\mu\text{m}$ ) | $\Delta E$<br>CIELAB2000 | WI<br>CIELAB2000 | $v_{\text{uts}}$<br>( $\text{km}\cdot\text{s}^{-1}$ ) | Ed<br>( $\text{MN}\cdot\text{m}^{-2}$ ) | HD      |
|--------------------|---------------------|-------------------------|--------------------------|------------------|-------------------------------------------------------|-----------------------------------------|---------|
| Before Acid attack | Pristine            | 45(5)                   | –                        | 85.05            | $2.8 \pm 0.2$                                         | $14.1 \pm 0.5$                          | 87(1)   |
|                    | Thermally weathered | 61(6)                   | –                        | 79.41            | $1.2 \pm 0.1$                                         | $2.41 \pm 0.04$                         | 75(1)   |
|                    | Immersion TR        | 48(3)                   | –                        | 85.23            | $2.1 \pm 0.1$                                         | $7.7 \pm 0.2$                           | 86(2)   |
|                    | Brushing TR         | 47(4)                   | –                        | 72.75            | $3.1 \pm 0.2$                                         | $16.5 \pm 0.6$                          | 90(2)   |
|                    | Spraying TR         | 40(5)                   | –                        | 84.12            | $2.2 \pm 0.2$                                         | $8.2 \pm 0.2$                           | 92.3(8) |
| After Acid attack  | Pristine            | 26(6)                   | 2.05                     | 73.02            | $2.7 \pm 0.2$                                         | $12.8 \pm 0.4$                          | 88.3(7) |
|                    | Thermally weathered | 54(11)                  | 3.20                     | 67.72            | $1.1 \pm 0.1$                                         | $2.0 \pm 0.03$                          | 74(6)   |
|                    | Immersion TR        | 63(11)                  | 1.56                     | 76.42            | $1.9 \pm 0.1$                                         | $6.1 \pm 0.2$                           | 87.7(2) |
|                    | Brushing TR         | 49(9)                   | 0.61                     | 75.00            | $3.4 \pm 0.2$                                         | $20.3 \pm 0.9$                          | 90.2(7) |
|                    | Spraying TR         | 42(3)                   | 2.18                     | 72.32            | $2.3 \pm 0.2$                                         | $9.4 \pm 0.3$                           | 92(1)   |

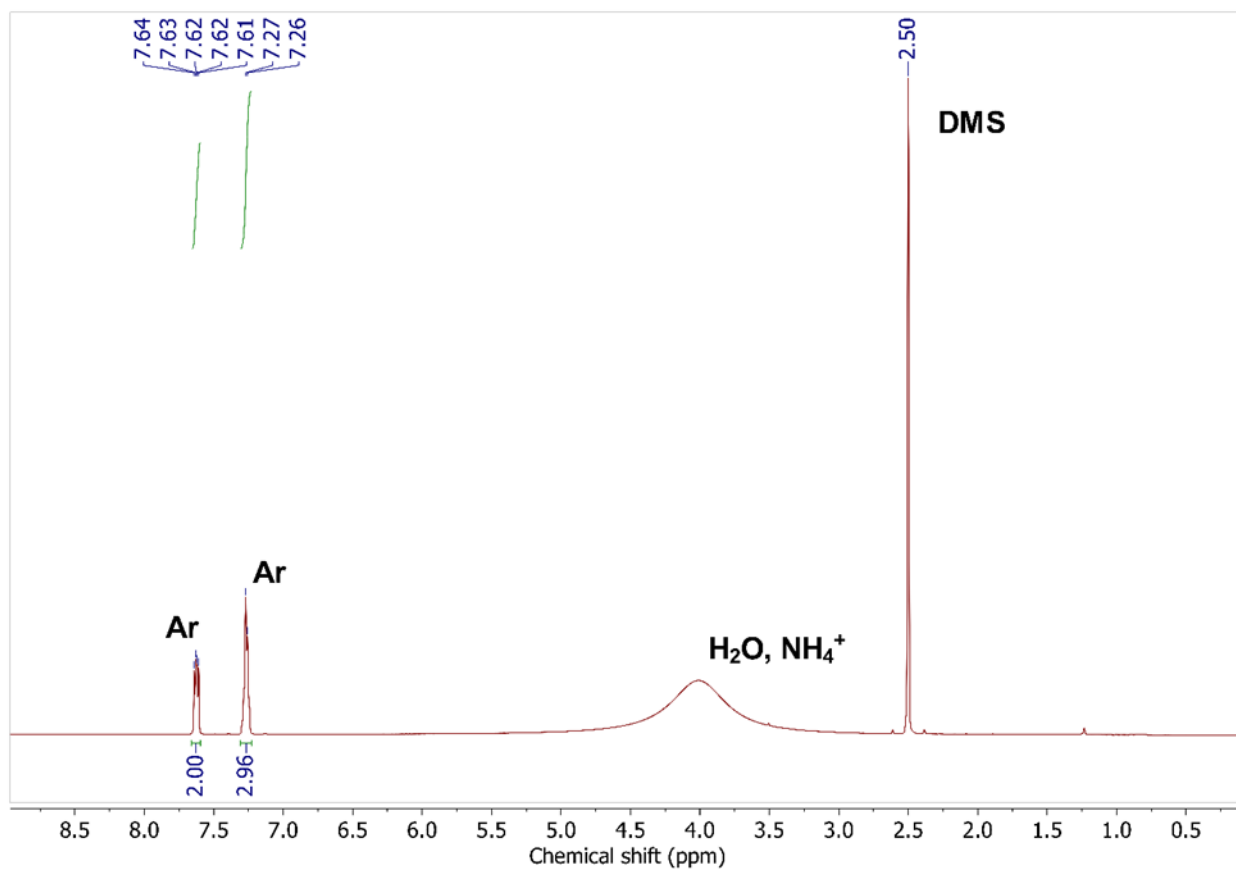

**Figure S1.**  $^1\text{H}$ -NMR spectrum recorded for compound **1** in  $\text{DMSO-d}_6$  solution. Marked signals are attributed as labelled.

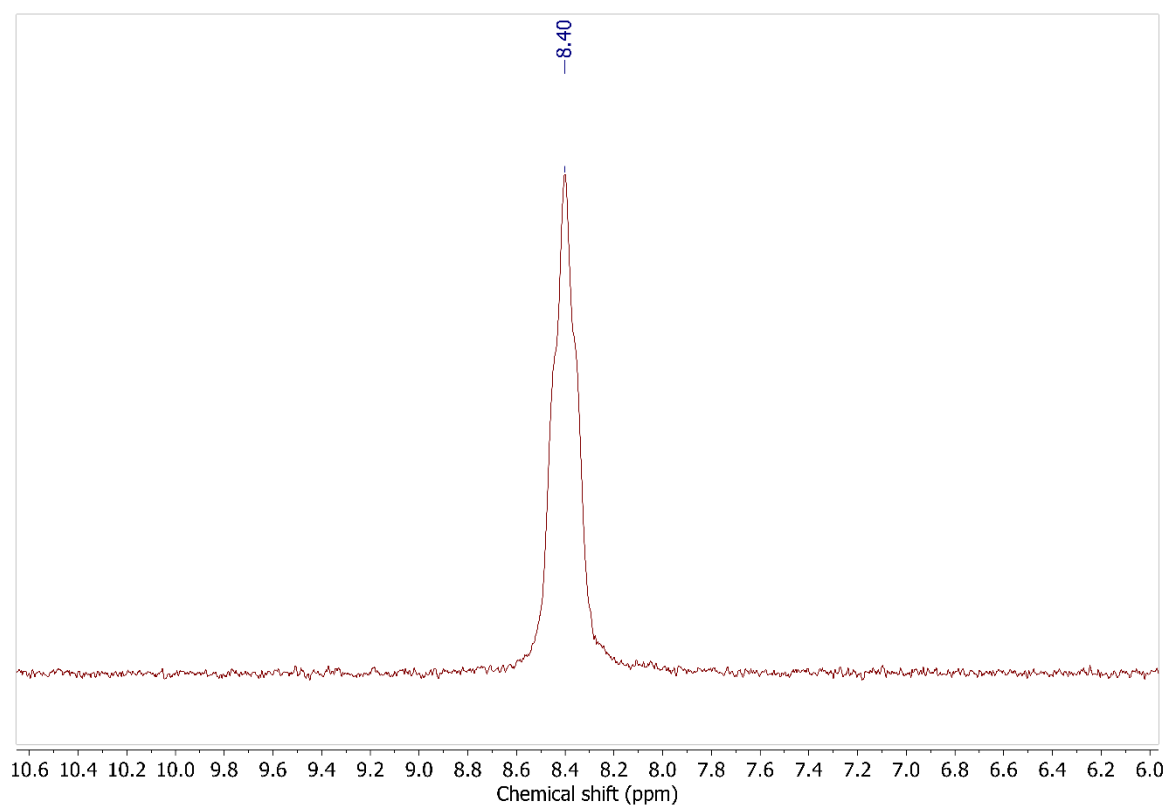

**Figure S2.**  $^{31}\text{P}$ -NMR spectrum recorded for compound **1** in  $\text{DMSO-d}_6$  solution.

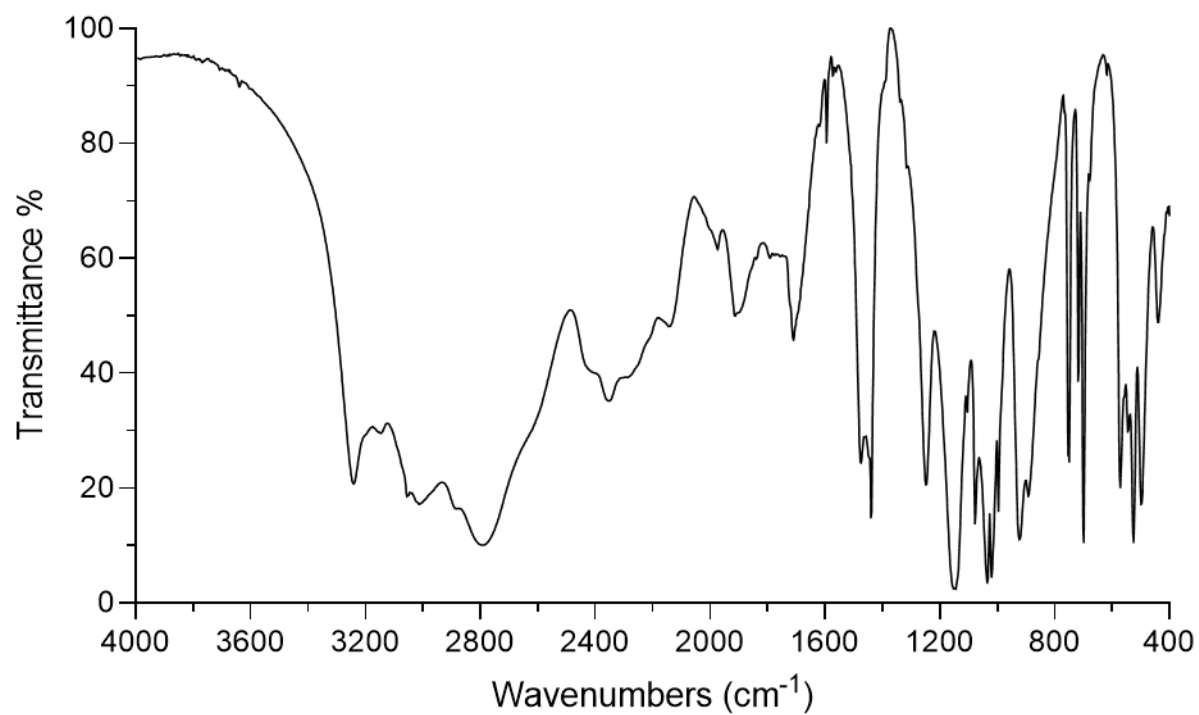

**Figure S3.** Solid state FT-IR spectrum (4000–400 cm<sup>-1</sup>) for compound **1** in KBr pellets.

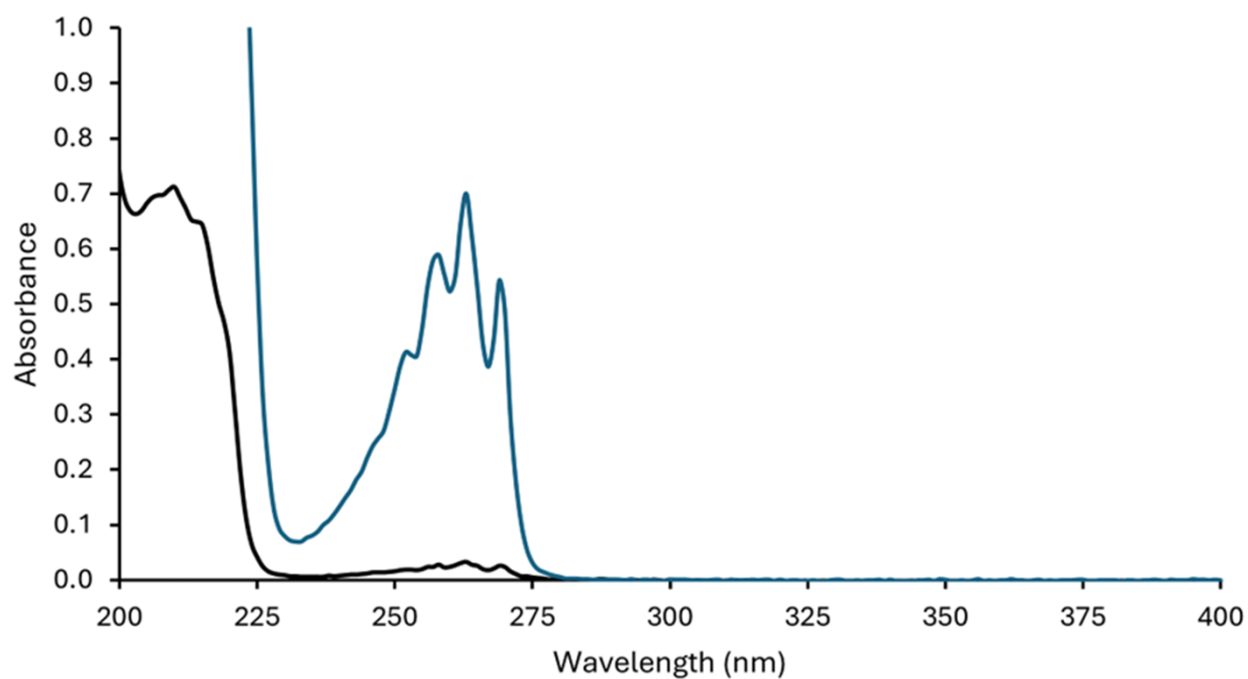

**Figure S4.** UV-Vis spectrum (200–400 nm) recorded for two water solutions of compound **1** with different concentration:  $4.8 \cdot 10^{-5} \text{ mol L}^{-1}$  (black line) and  $1.0 \cdot 10^{-3} \text{ mol L}^{-1}$  (blue line).

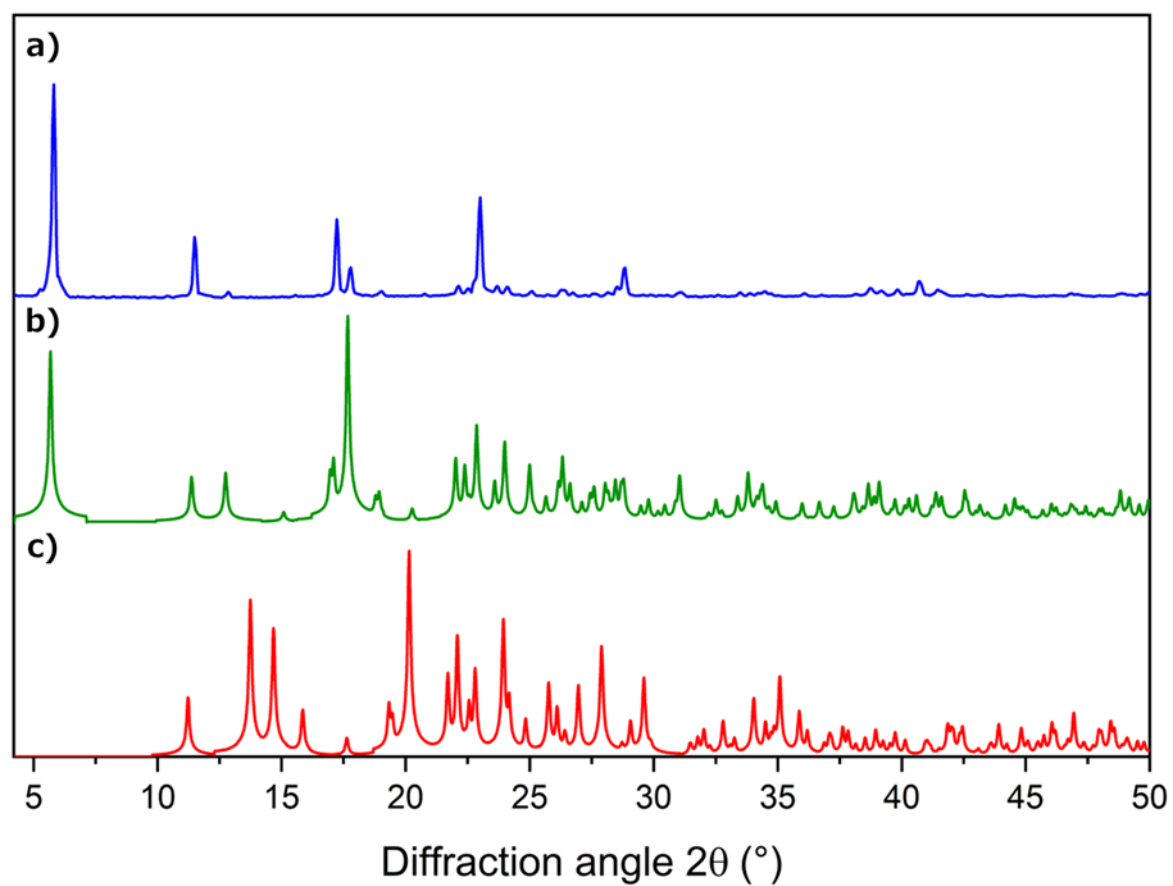

**Figure S5.** PXRD diffractograms recorded for compound **1** (a) and calculated from single-crystal XRD analysis of ammonium hydrogen phenylphosphonate (b; CSD entry YODNAH) and phenylphosphonic acid (c; CSD entry BZPHOT).

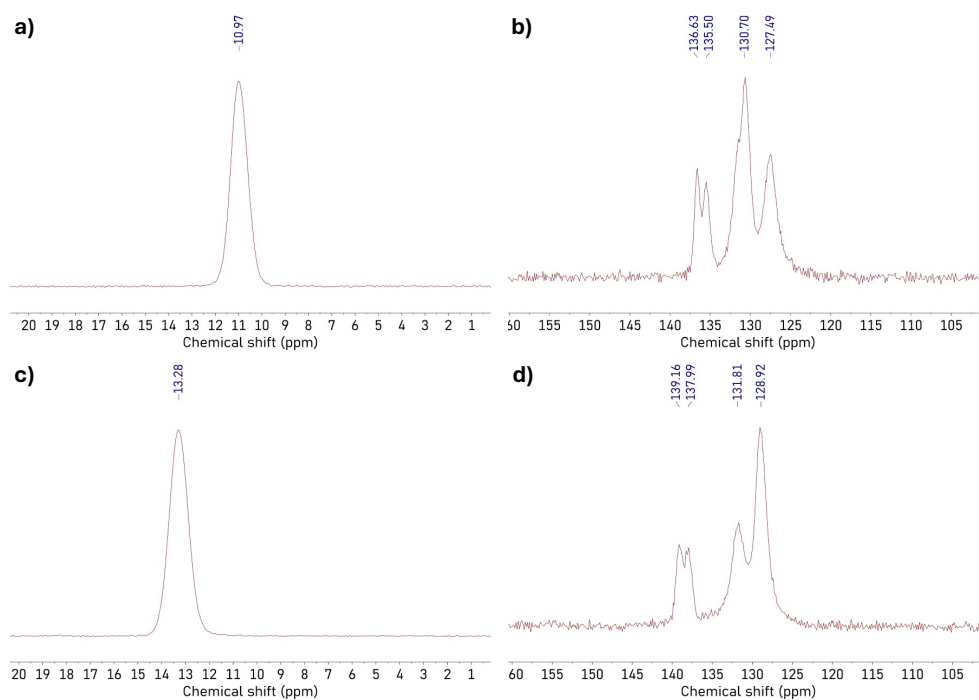

**Figure S6.** CP-MAS  $^{31}\text{P}$ -NMR and  $^{13}\text{C}$ -NMR spectrum recorded for 0.4 g of a powder of compound **1** (a and b) and compound **2** (c and d).

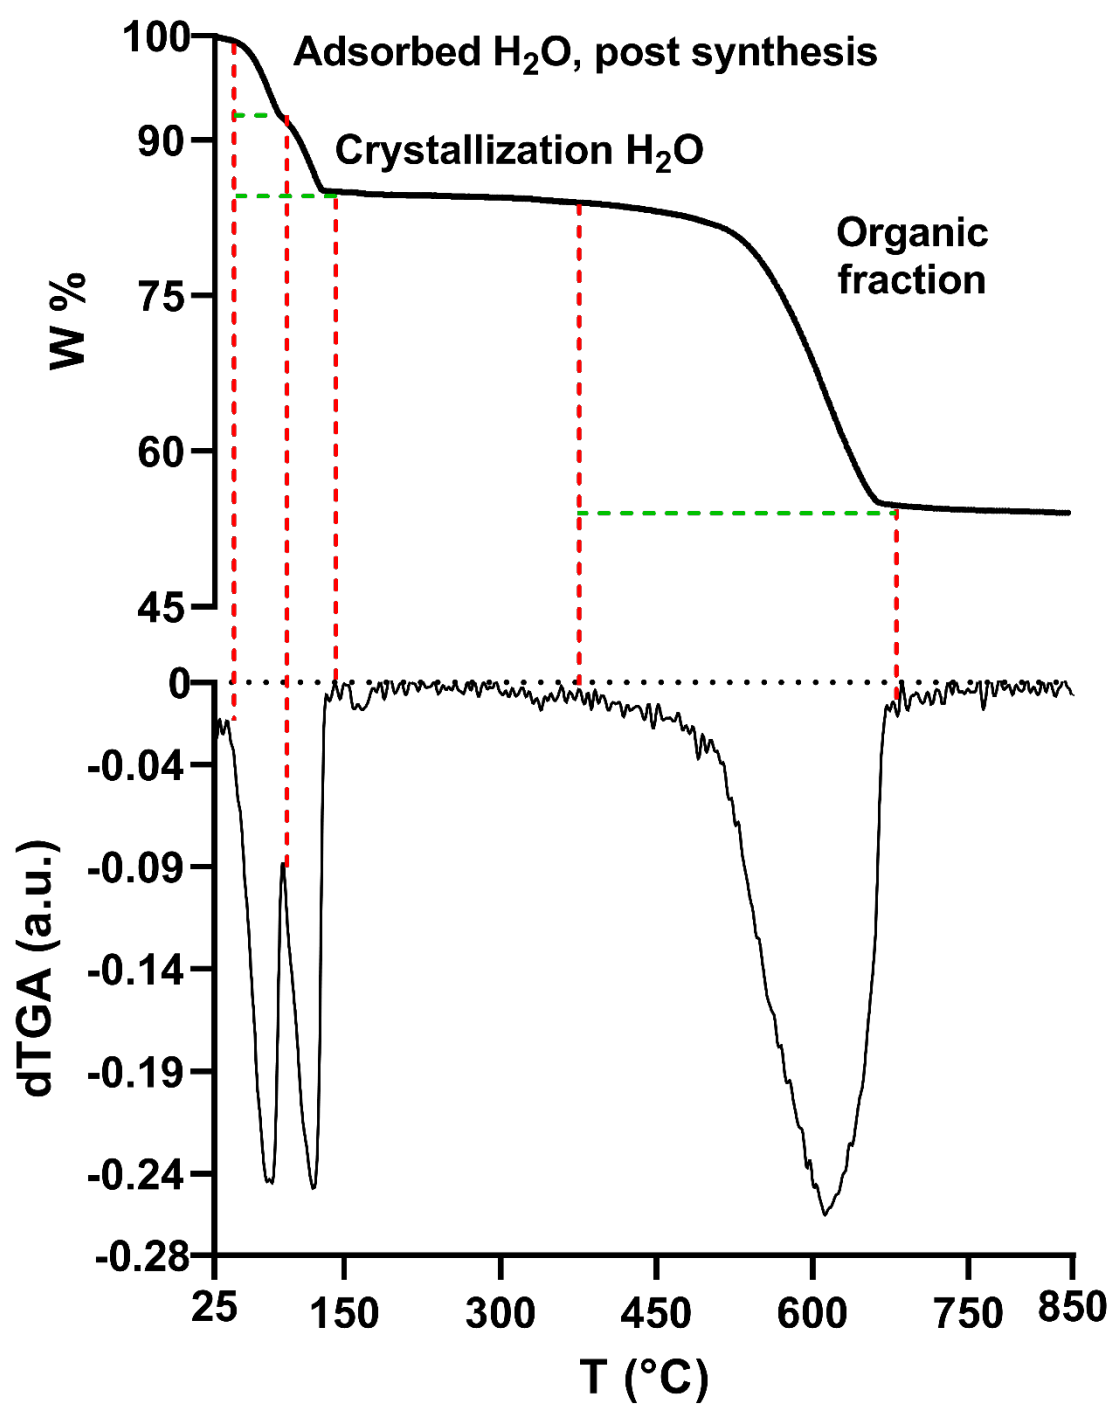

**Figure S7.** Thermogravimetric analysis (TGA) under N<sub>2</sub> flow for compound 2.



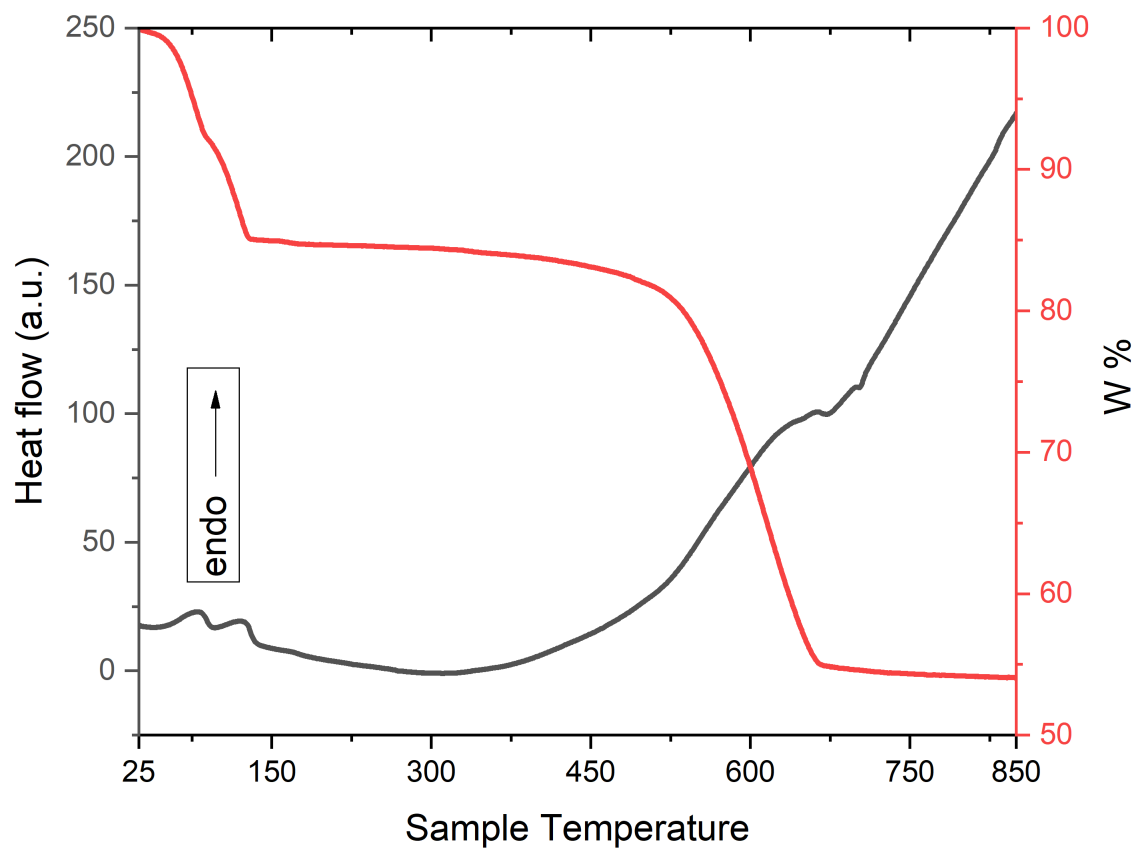

**Figure S8.** Differential Scanning Calorimetry (DSC) recorded during a TGA under N<sub>2</sub> flow for compound **2**.

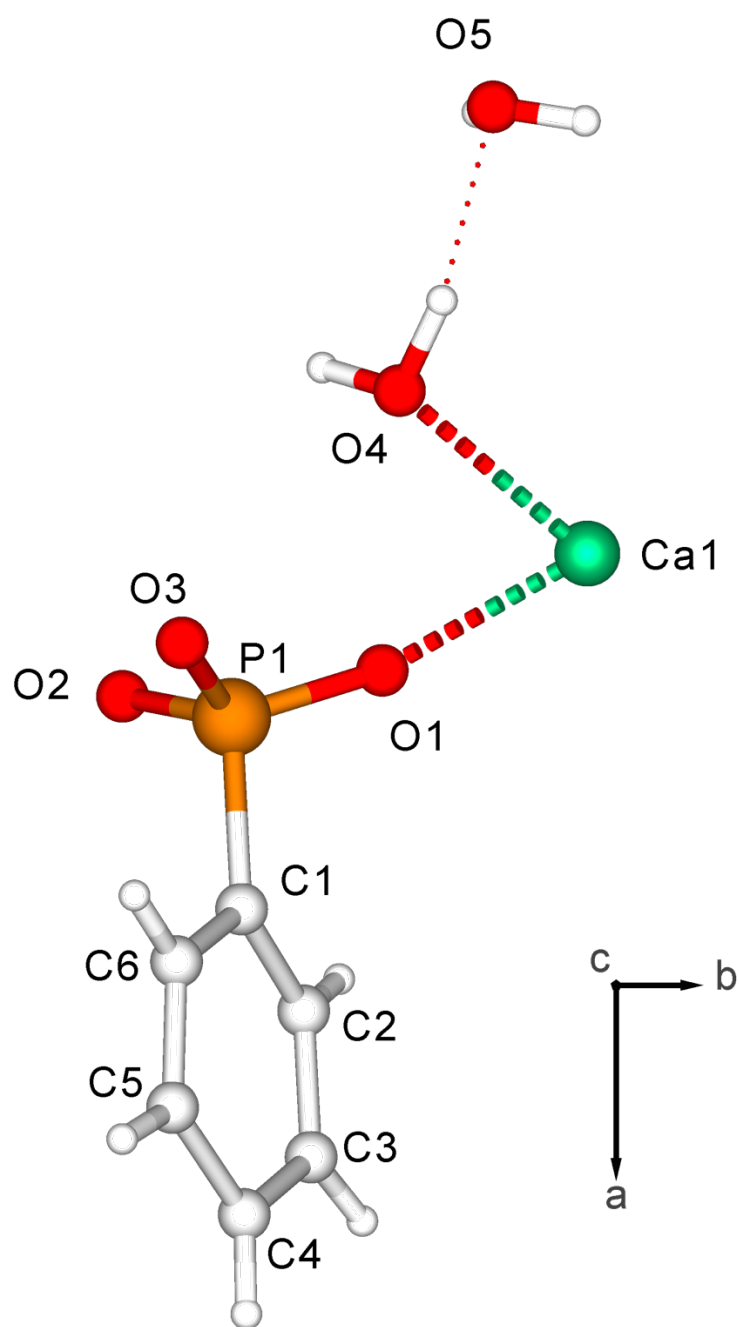

**Figure S9.** Structure and atom labelling scheme of compound **2** determined by 3D ED analysis.

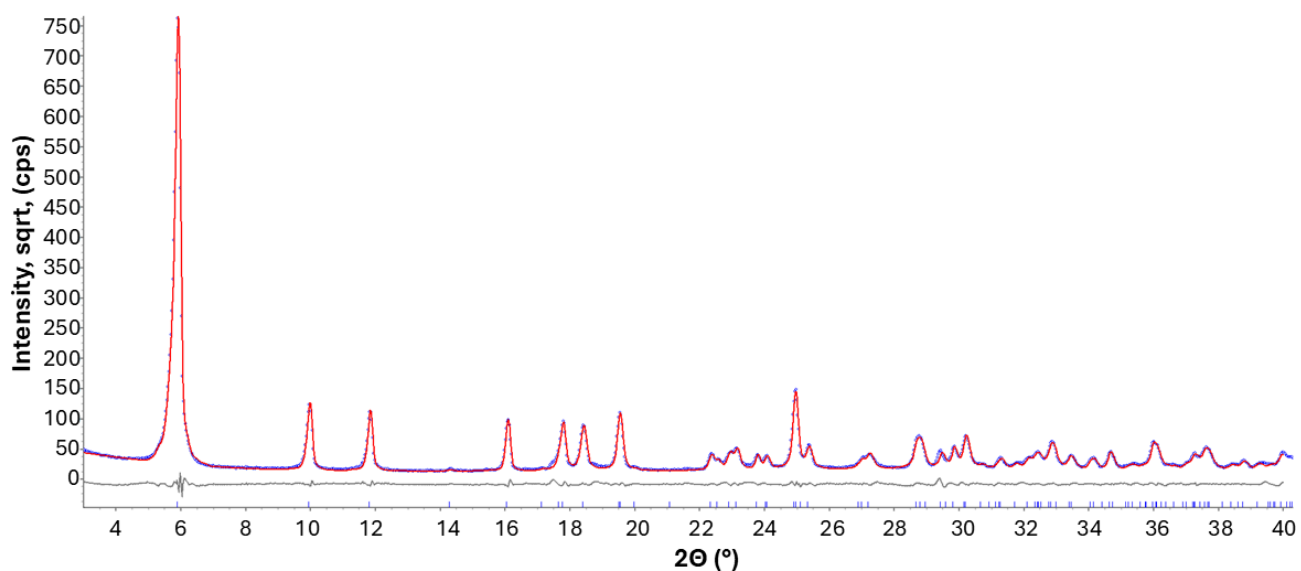

**Figure S10.** Rietveld refinement of the experimental PXRD data using the structural model derived from 3D ED data of compound **2**. The observed diffraction pattern is represented by blue dots, while the calculated and difference curves are shown in red and grey, respectively. Bragg reflections positions are marked by vertical blue ticks.

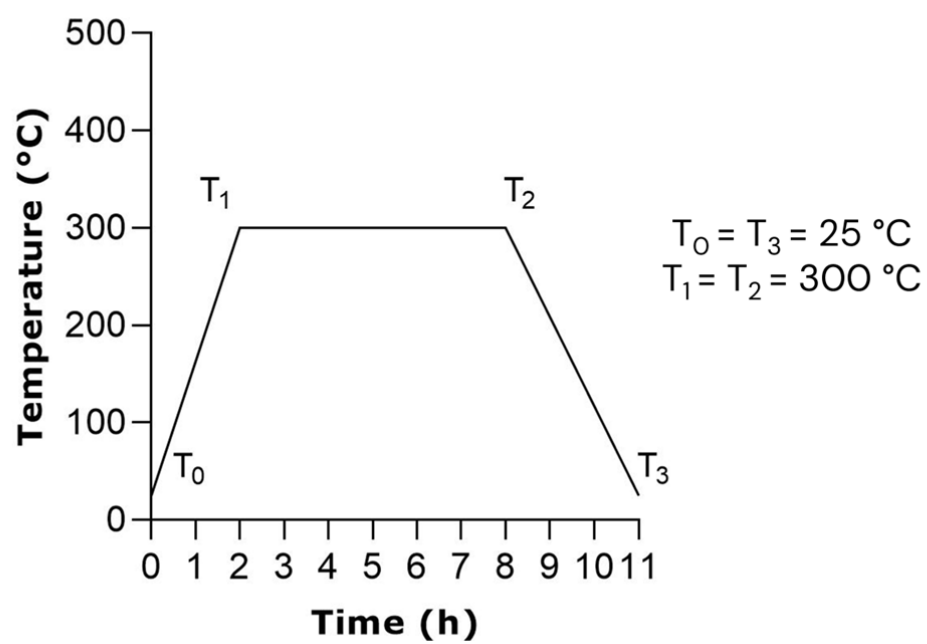

**Figure S11.** Thermal treatment diagram for the artificial weathering of Carrara Marble.

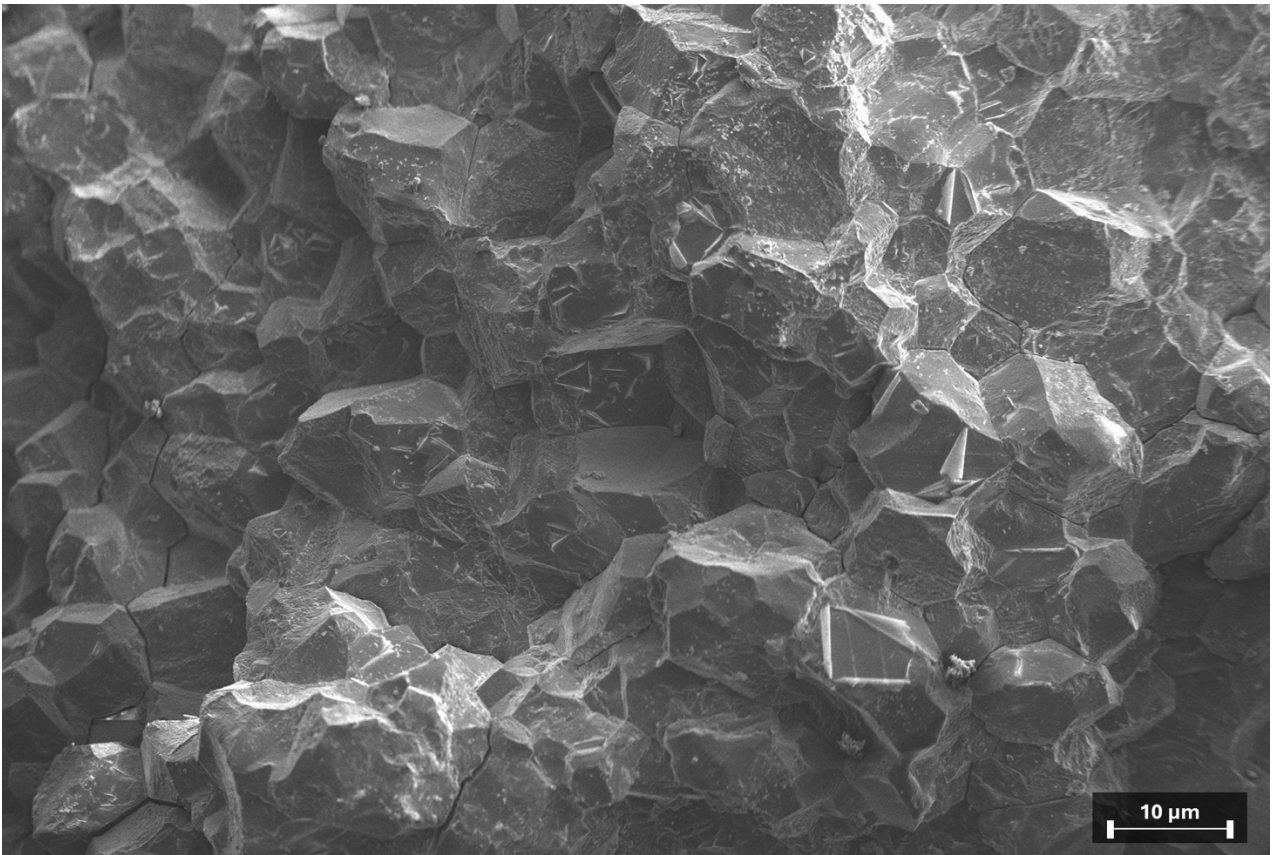

**Figure S12.** SEM Image of the white Carrara marble stone surface after the thermal weathering process.

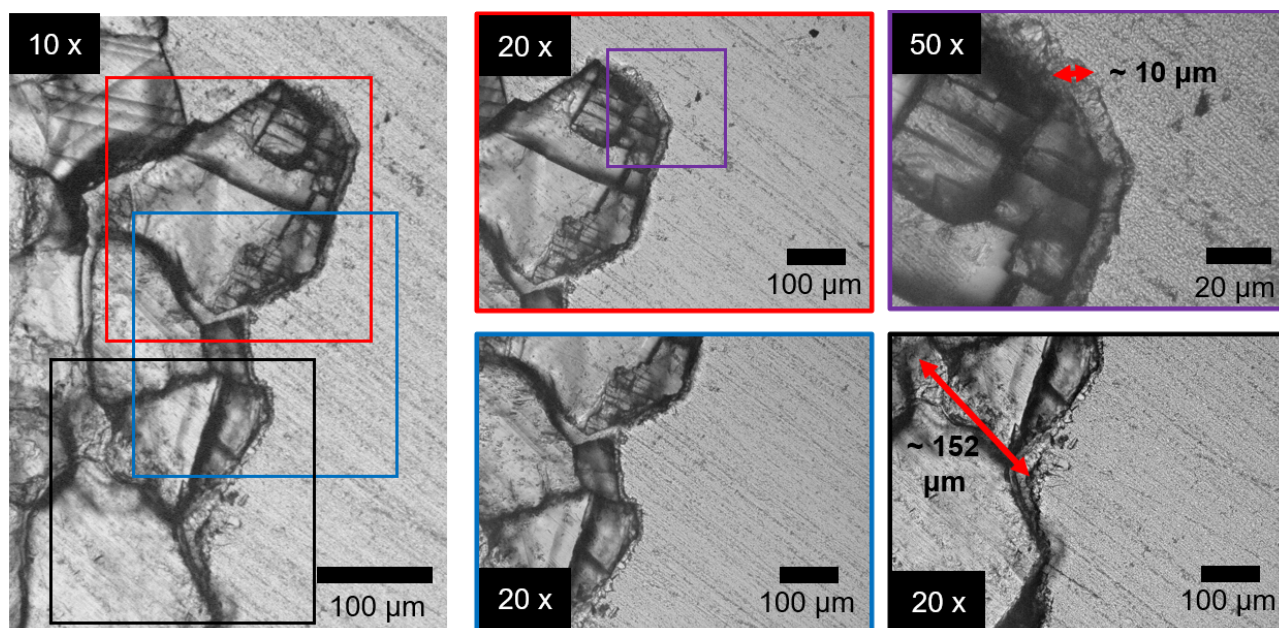

**Figure S13.** Optical microscopy images of a cross-section of white Carrara marble treated with an immersion in a 5% w/w solution of compound **1**. Coloured squares show the sites where the pictures with higher magnification were acquired.

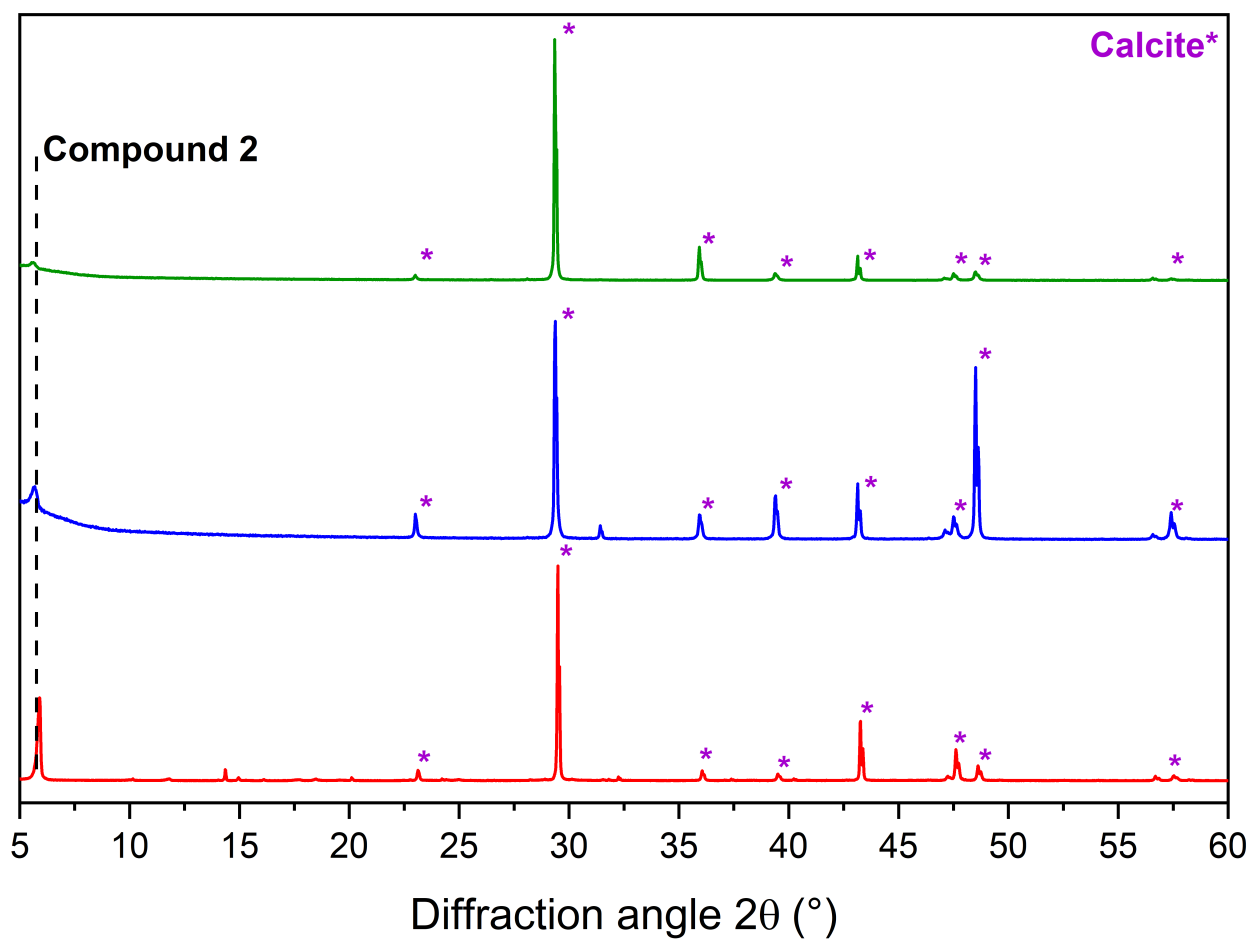

**Figure S14.** PXRD patterns of white Carrara marble mock-ups treated with a 5% w/w solution of compound **1** by immersion (red), brushing (blue), and spraying (green).

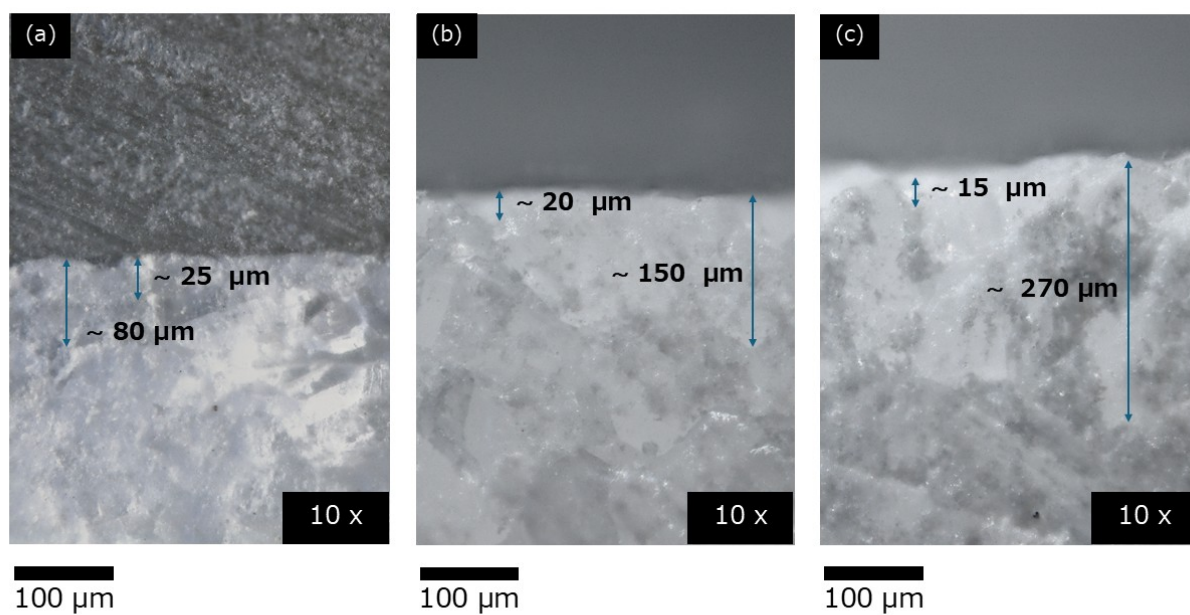

**Figure S15.** Optical microscopy images of a section of white Carrara marble treated with a 5% w/w solution of compound **1**, applied by immersion (a), brushing (b), and spraying (c).



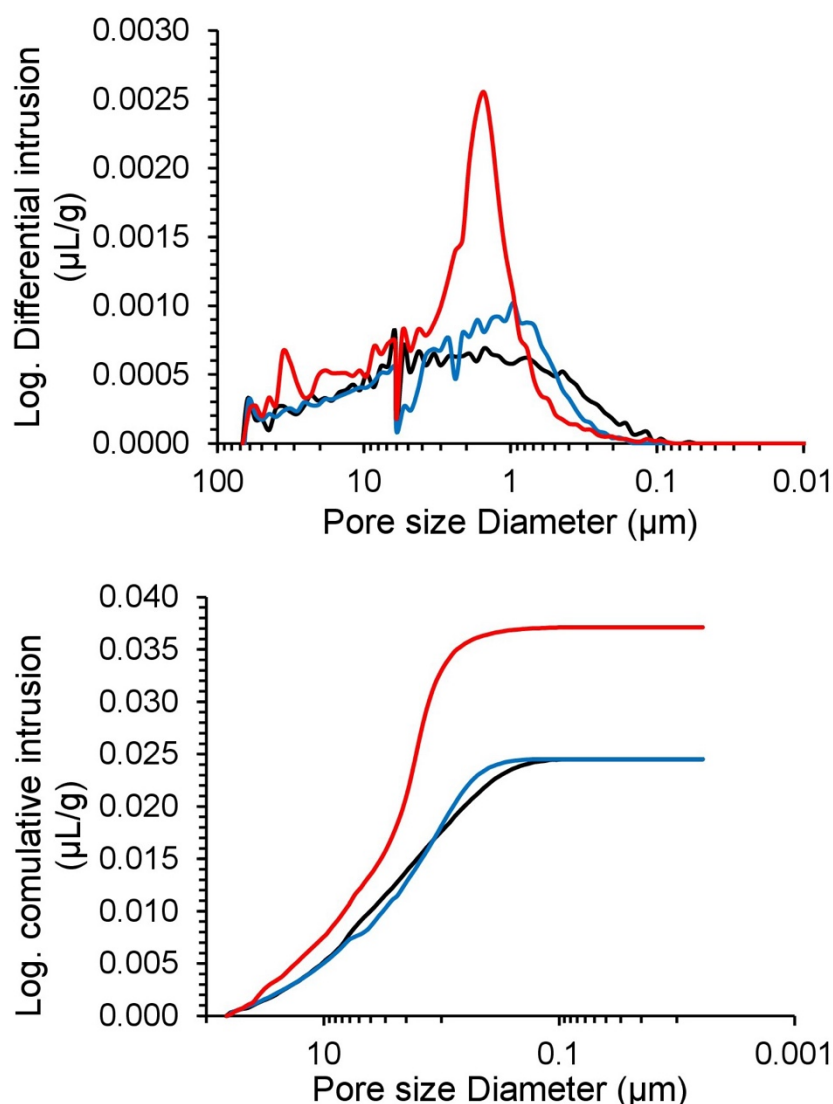

| Sample  | Average pore size (μm) | Porosity, $\Phi_{\text{Hg}}\%$ | Skeletal density, $\rho_{\text{skeletal Hg}} (\text{g}\cdot\text{cm}^{-3})$ | Bulk density $\rho_{\text{bulk Hg}} (\text{g}\cdot\text{cm}^{-3})$ |
|---------|------------------------|--------------------------------|-----------------------------------------------------------------------------|--------------------------------------------------------------------|
| PR      | 0.9 (5)                | 1.7 (5)                        | 2.7 (1)                                                                     | 2.6 (1)                                                            |
| TW      | 1.0 (5)                | 2.1 (2)                        | 2.7 (1)                                                                     | 2.6 (1)                                                            |
| Imm. TR | 0.8 (5)                | 2.7 (2)                        | 2.7 (1)                                                                     | 2.7 (1)                                                            |

**Figure S16.** Differential (top) and cumulative (bottom) intrusion of Hg, measured with Mercury Intrusion Porosimetry (MIP), on pristine (PR, black), thermally weathered (TW, blue) and treated by immersion with a 5% w/w solution of compound **1** (TR, red) white Carrara marble fragments ( $\sim 1 \text{ cm}^3$ ). The structural parameters determined with the analysis are reported in the Table.

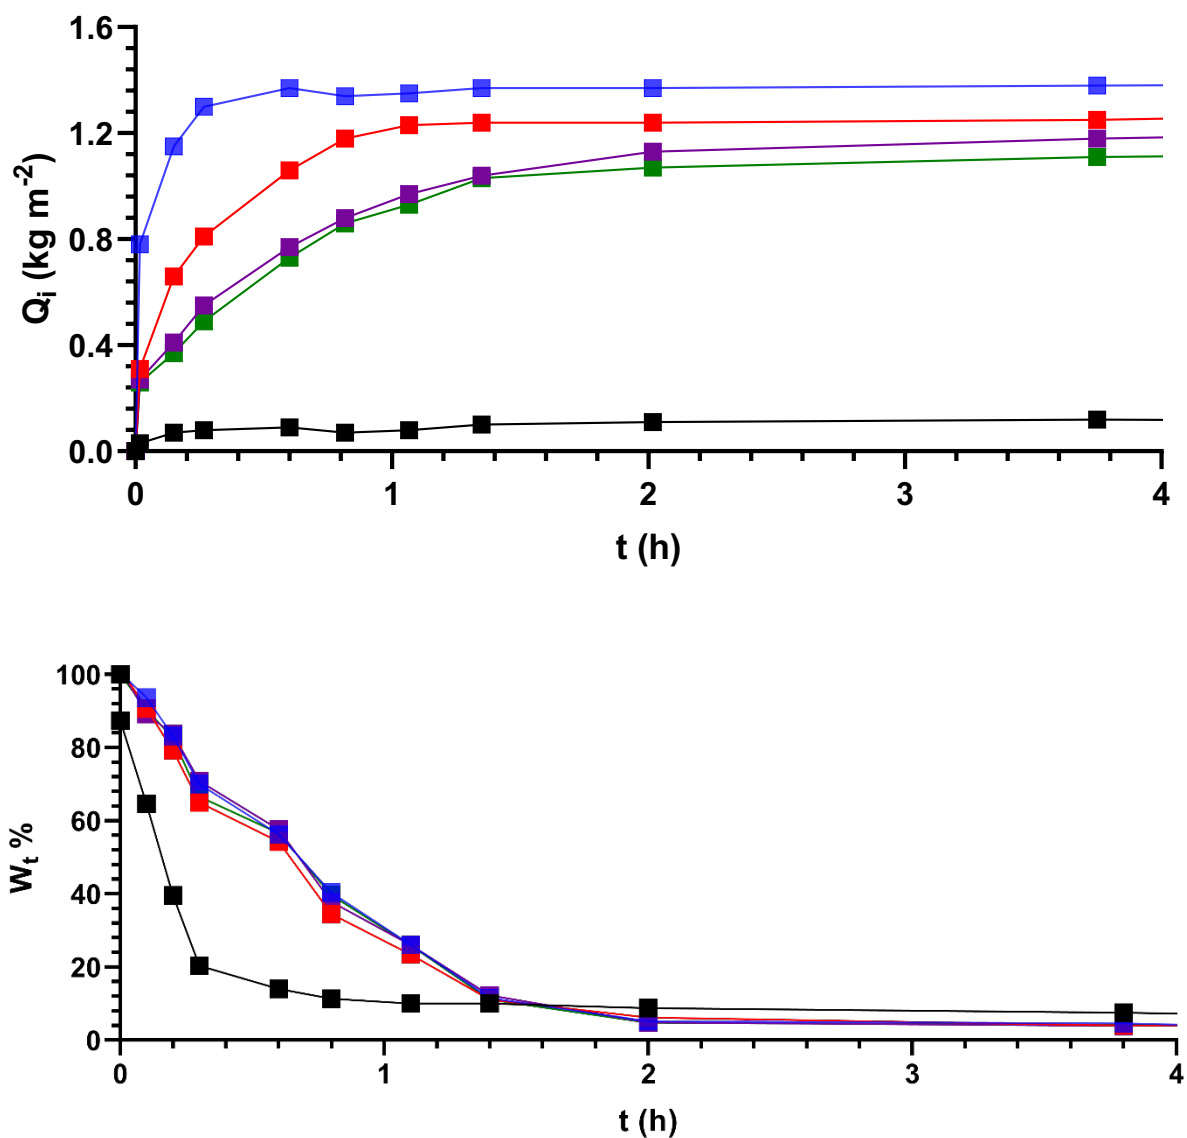

**Figure S17.** Water capillary absorption (top) and desorption (bottom) measured on white Carrara marble mock-ups: pristine (black), thermally weathered (blue), treated by immersion (red), brushing (purple), and spraying (green) with a 5% w/w solution of compound **1**.

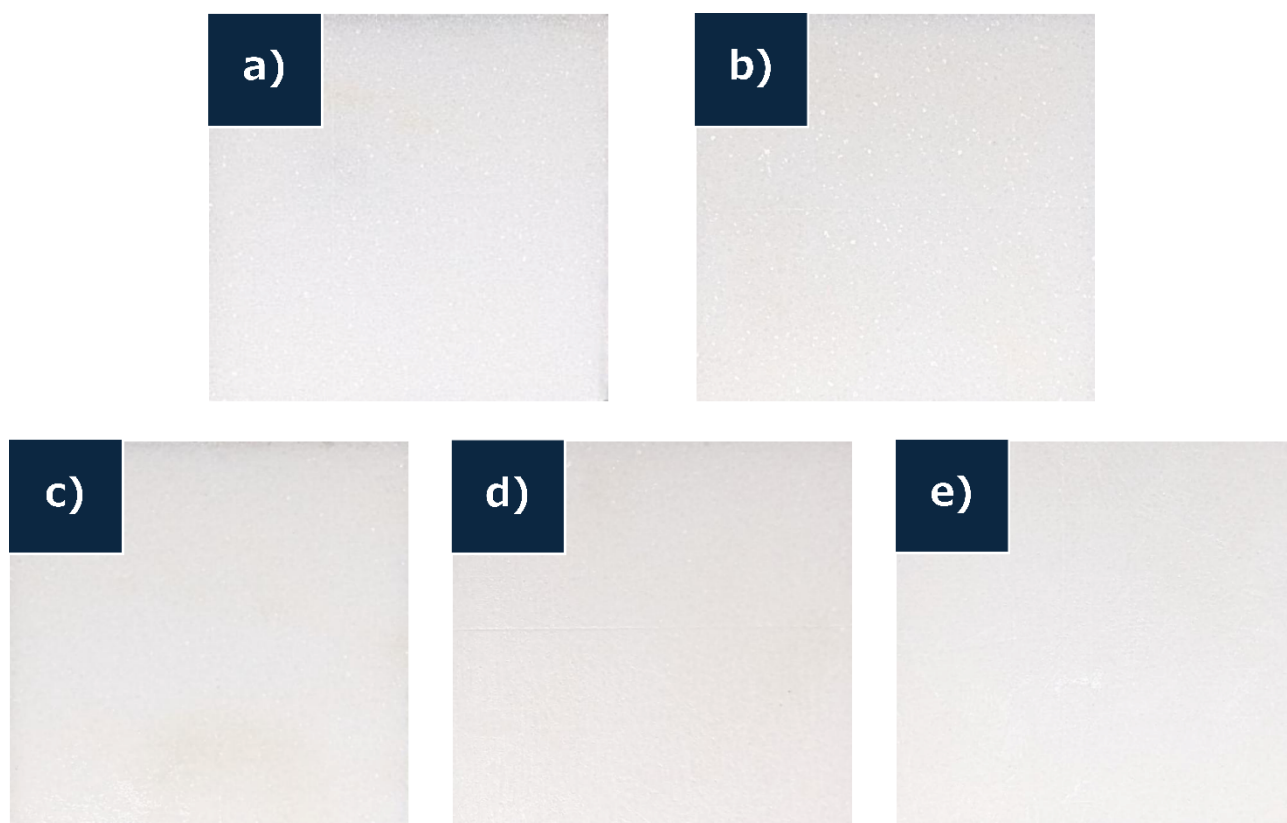

**Figure S18.** Photographs under a plain white led of 4.5 x 4.5 x 2.0 cm white Carrara marble mock-ups: pristine (a), thermally weathered (b), and treated by immersion (c), brushing (d), spraying (e) with a 5% w/w solution of compound **1**.

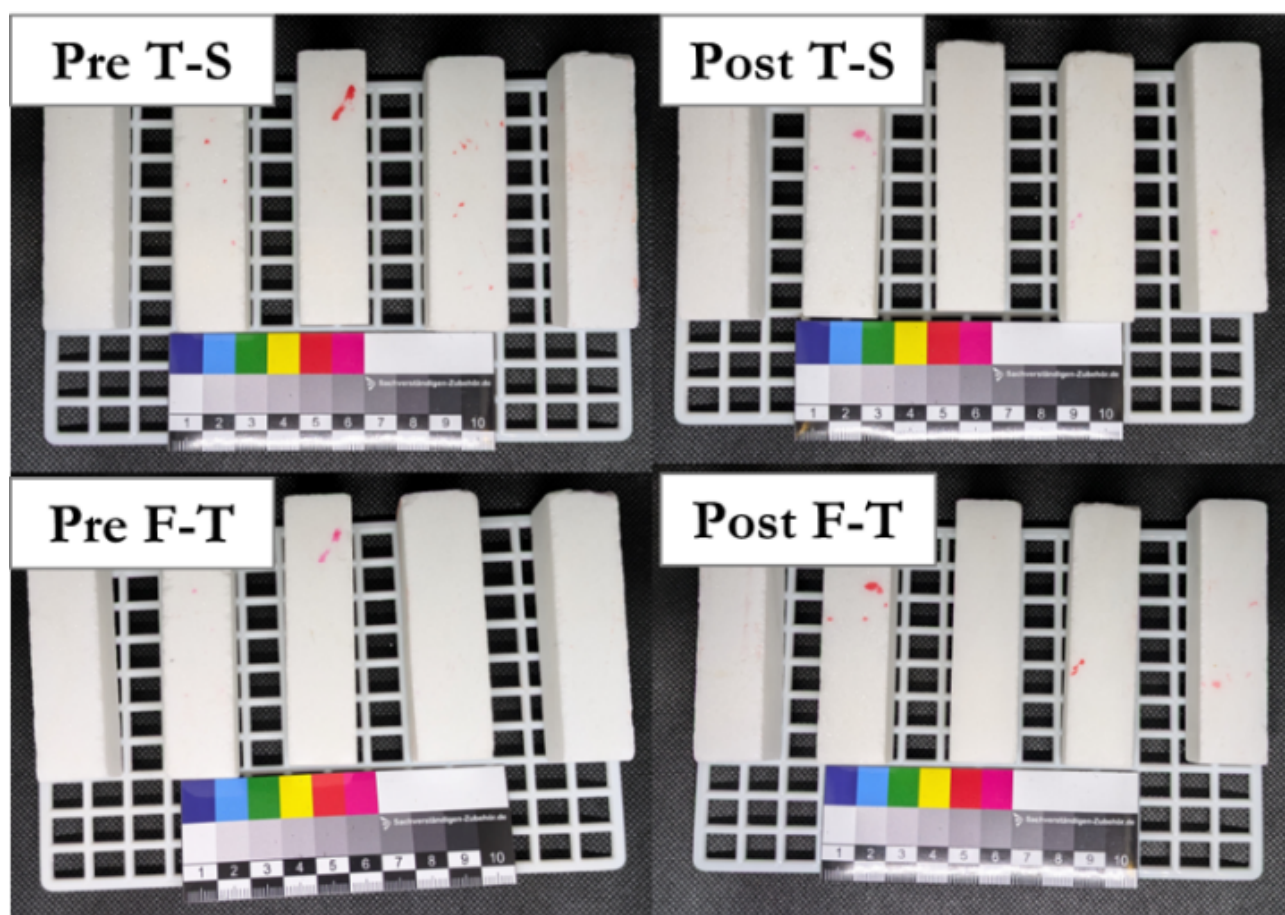

**Figure S19:** White Carrara marble stone mock-ups subjected to the T-S and F-T tests. From left to right: pristine, thermally weathered, immersion-, brushing-, and spraying-treated with a 5.0% w/w solution of compound **1**.

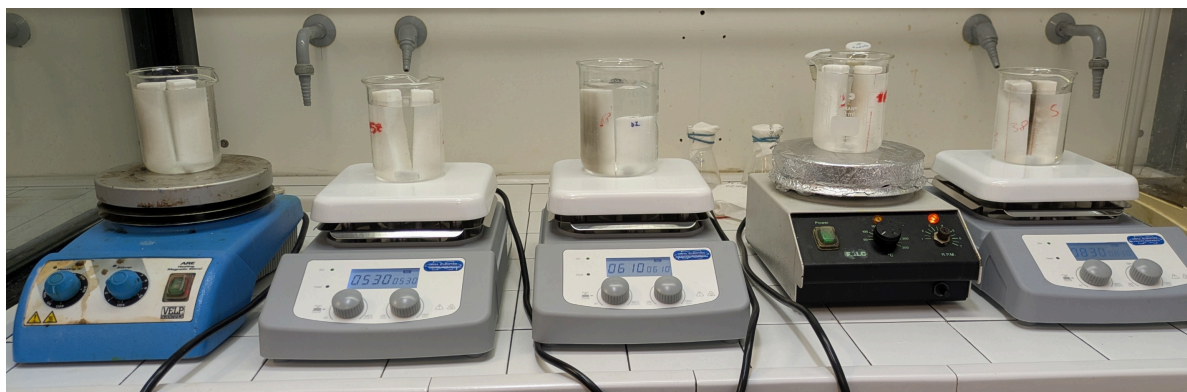

**Figure S20:** Experimental set-up for the acid attack resistance test.



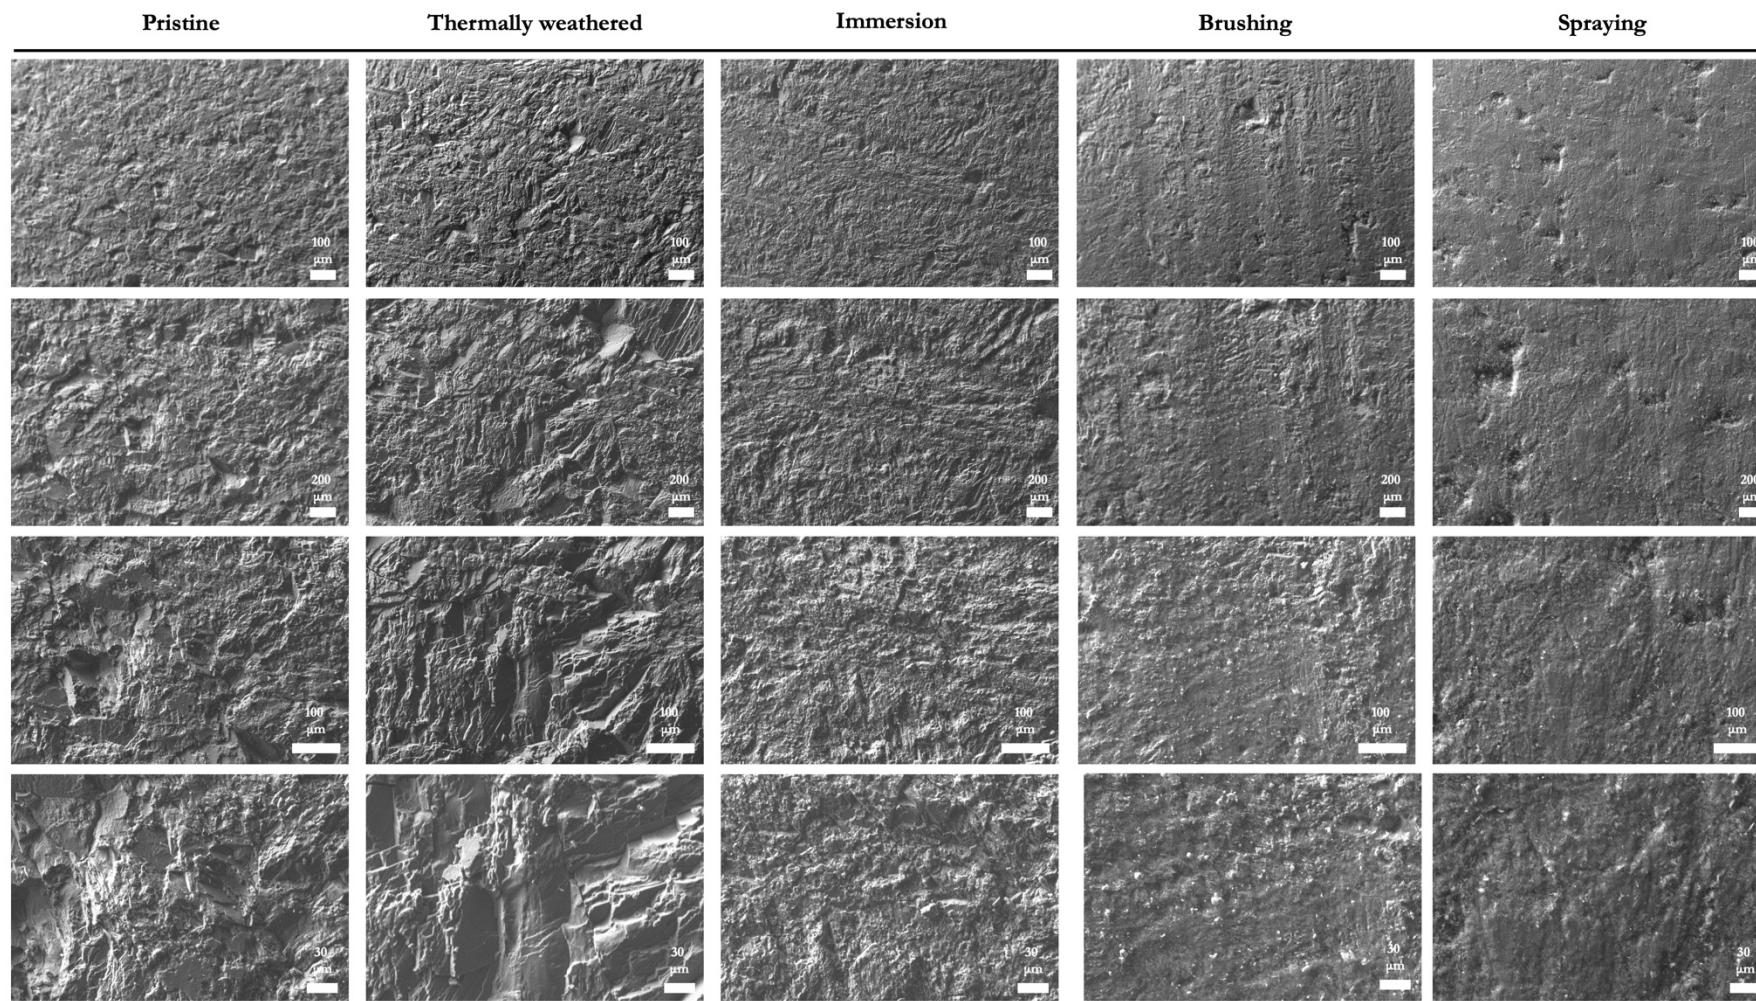

**Figure S21:** SEM images for white Carrara stone mock-ups surfaces before the acid attack experiment. Magnification increases from top to bottom.

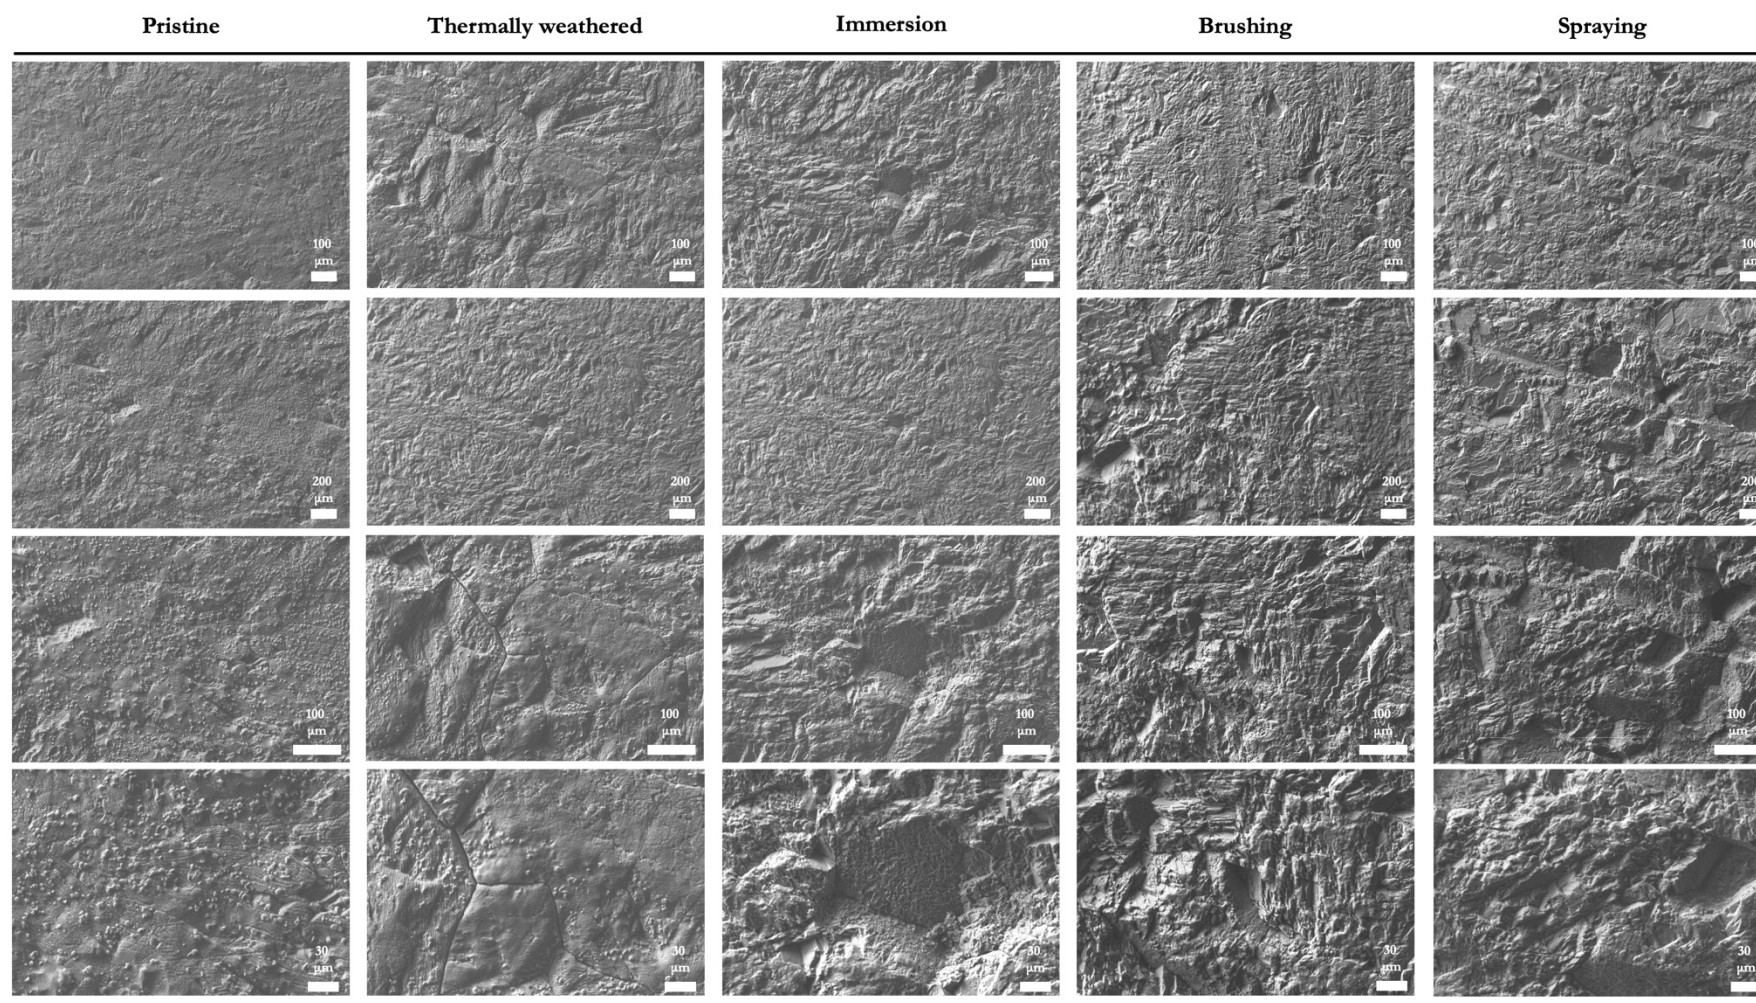

**Figure S22:** SEM images for white Carrara stone mock-ups surfaces after the acid attack experiment. Magnification increases from top to bottom.

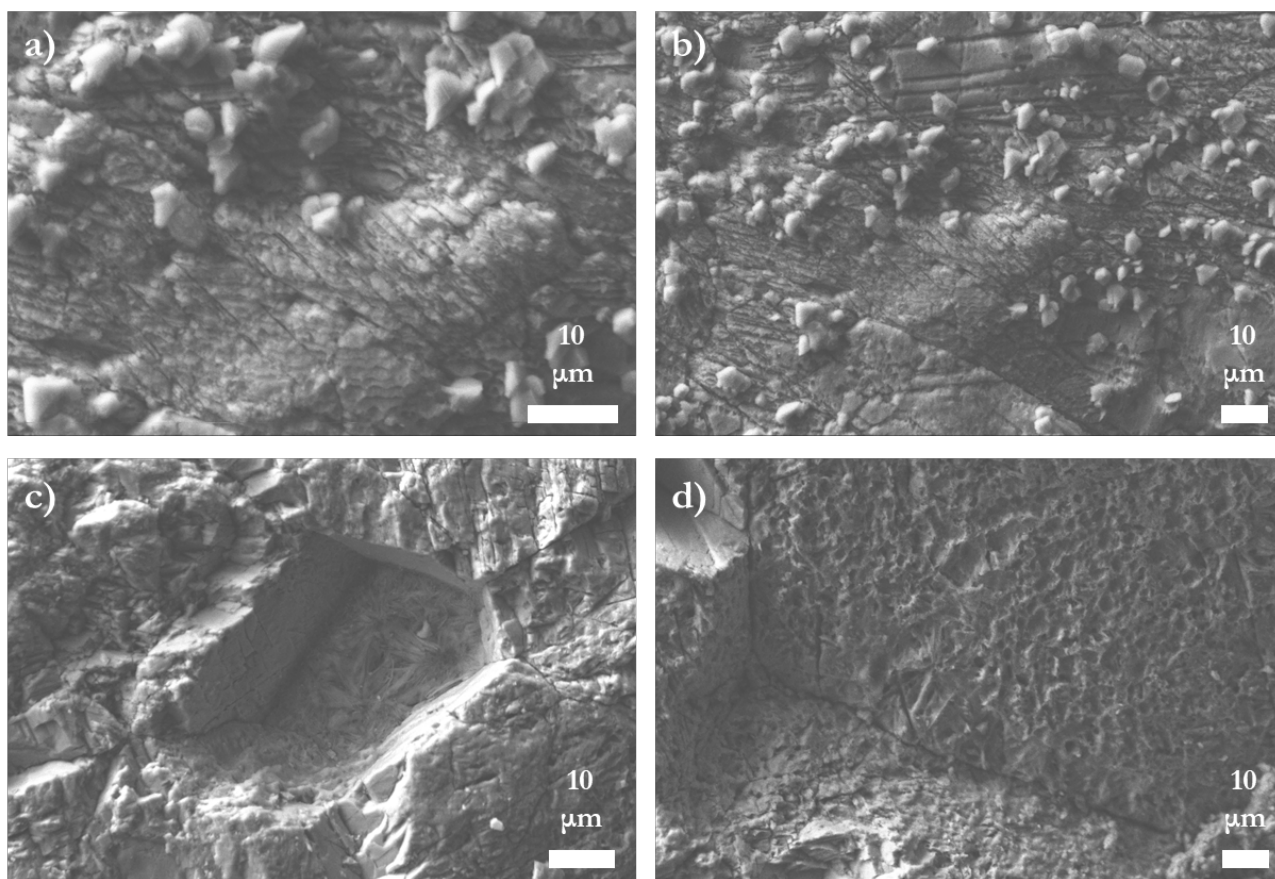

**Figure S23:** SEM images showing the effects of the acid attack on a pristine specimen (a and b); grain detachment over deposited compound **2** (c); effect of acid washing on calcite exposed after the removal of compound **2** (d).
